# Supplementary material for: ANI-Guided vs. Standard Remifentanil Dosing in Spine Surgery: A Randomized Controlled Trial
Source: Research Square preprint supplement (doi:10.21203/rs.3.rs-7362858/v1), 2025-11-05
Supplement: Supplementary file 1 [file 27e66f9637aa07ed38f29543.docx]

|  | Section/topic | No | CONSORT 2025 checklist item description | Reported on page no. |
| --- | --- | --- | --- | --- |
|  | **Title and abstract** | | |  |
|  | Title and structured abstract | 1a | Identification as a randomised trial  **Yes. The title clearly identifies the study as a randomized controlled trial** | 1 |
|  | 1b | Structured summary of the trial design, methods, results, and conclusions  **The abstract is structured and includes all required elements: trial design (assessor-blinded, randomized controlled trial), methods (participant eligibility, intervention details, outcomes), results (effect estimates with p-values), and conclusions. Trial registration is also reported. The abstract adheres to CONSORT guidelines**. | 1 |
|  | **Open science** | | |  |
|  | Trial registration | 2 | Name of trial registry, identifying number (with URL) and date of registration  **The trial was registered in the Iranian Registry of Clinical Trials (IRCT) under the identifier IRCT20230901059132N1 on September 10, 2023. The registration details are available at: https://www.irct.ir/trial/70163** | 1 |
|  | Protocol and statistical analysis plan | 3 | Where the trial protocol and statistical analysis plan can be accessed  **The trial protocol and statistical analysis plan were submitted to the Iranian Registry of Clinical Trials (IRCT) and can be accessed through the registry entry:** [**https://www.irct.ir/trial/70163**](https://www.irct.ir/trial/70163) | 4 |
|  | Data sharing | 4 | Where and how the individual de-identified participant data (including data dictionary), statistical code and any other materials can be accessed  **Individual de-identified participant data and statistical code are not publicly available but can be provided upon reasonable request from the corresponding author**. | 10 |
|  | Funding and conflicts of interest | 5a | Sources of funding and other support (eg, supply of drugs), and role of funders in the design, conduct, analysis and reporting of the trial  **This study was financially supported by Tehran University of Medical Sciences. The funding institution had no role in the design, conduct, data analysis, or reporting of the trial.** | 10 |
|  | 5b | Financial and other conflicts of interest of the manuscript authors  **The authors declare that they have no financial or other conflicts of interest related to this study.** | 10 |
|  | **Introduction** | | |  |
|  | Background and rationale | 6 | Scientific background and rationale  **The introduction provides a clinical rationale for using Analgesia Nociception Index (ANI) monitoring to optimize intraoperative opioid administration and improve postoperative pain outcomes in lumbar spine surgery**. | 2 |
|  | Objectives | 7 | Specific objectives related to benefits and harms  **The objective was to evaluate the effectiveness of ANI-guided remifentanil administration in reducing postoperative pain and opioid consumption, while monitoring for potential harms such as hemodynamic instability and postoperative nausea and vomiting.** | 2 |
|  | **Methods** | | |  |
|  | Patient and public involvement | 8 | Details of patient or public involvement in the design, conduct and reporting of the trial  **Patients were not involved in the design, conduct, or reporting of the trial.** | Not reported in the manuscript. |
|  | Trial design | 9 | Description of trial design including type of trial (eg, parallel group, crossover), allocation ratio, and framework (eg, superiority, equivalence, non-inferiority, exploratory)  **The study was a parallel-group randomized controlled trial with a 1:1 allocation ratio, designed to assess the superiority of ANI-guided remifentanil administration over standard clinical practice in improving postoperative pain outcomes in lumbar spine surgery**. | 3 |
|  | Changes to trial protocol | 10 | Important changes to the trial after it commenced including any outcomes or analyses that were not prespecified, with reason  **No important changes to the trial protocol, outcomes, or analyses were made after the trial commenced.** | 3 |
|  | Trial setting | 11 | Settings (eg, community, hospital) and locations (eg, countries, sites) where the trial was conducted  **The trial was conducted at Tehran University of Medical Sciences** | 3 |
|  | Eligibility criteria | 12a | Eligibility criteria for participants  **Inclusion criteria: Adults aged 18–70 years with ASA physical status I–II scheduled for elective lumbar spine surgery under general anesthesia. Exclusion criteria: Cardiac arrhythmias, beta-blocker use, neuromuscular disorders, diabetes mellitus, pregnancy, history of opioid addiction, incomplete ANI data, or ICU admission before emergence.** | 4 |
|  | 12b | If applicable, eligibility criteria for sites and for individuals delivering the interventions (eg, surgeons, physiotherapists)  **Setting: Sina Hospital, affiliated with Tehran University of Medical Sciences.**  **Location: Tehran, Iran.**  **Timeframe: June 2018 to June 2019.** | 3 |
|  | Intervention and comparator | 13 | Intervention and comparator with sufficient details to allow replication. If relevant, where additional materials describing the intervention and comparator (eg, intervention manual) can be accessed  **Intervention group: Remifentanil titrated using ANI monitor (target range: 50–70). Control group: Remifentanil titrated based on clinical signs (e.g., heart rate, blood pressure). Both groups received standard induction and BIS-guided propofol infusion. The intervention protocol is described in detail in the manuscript and can be replicated**. | 3 |
|  | Outcomes | 14 | Prespecified primary and secondary outcomes, including the specific measurement variable (eg, systolic blood pressure), analysis metric (eg, change from baseline, final value, time to event), method of aggregation (eg, median, proportion), and time point for each outcome  **Primary outcome: Postoperative pain intensity measured by VAS at 1, 6, 12, and 24 hours after surgery.**  **Secondary outcomes: Total opioid consumption (mg), ANI values during surgery, hemodynamic stability (MAP, HR), and incidence of postoperative nausea and vomiting.**  **Aggregation: Mean ± SD; comparisons made between groups at each time point**. | 5 |
|  | Harms | 15 | How harms were defined and assessed (eg, systematically, non-systematically)  **Harms were assessed systematically. Postoperative nausea and vomiting (PONV) and hemodynamic instability (MAP, HR fluctuations) were monitored and recorded during recovery. No serious adverse events were reported.** | 6 |
|  | Sample size | 16a | How sample size was determined, including all assumptions supporting the sample size calculation  **Sample size calculated for VAS difference (α = 0.05, power = 80%, n = 30/group), based on prior data.** | 4 |
|  | 16b | Explanation of any interim analyses and stopping guidelines  **No interim analyses were planned or conducted. No formal stopping guidelines were established**. | - |
|  | Randomisation: |  |  |  |
|  | Sequence generation | 17a | Who generated the random allocation sequence and the method used  **The random allocation sequence was generated by a statistician using a computer-based random number generator with a 1:1 allocation ratio** | 3 |
|  | 17b | Type of randomisation and details of any restriction (eg, stratification, blocking and block size) | 3 |
|  |  |  | **Simple randomisation with a 1:1 allocation ratio was used. No restrictions such as blocking or stratification were applied.** | **Reported on page no.** |
|  | Allocation concealment mechanism | 18 | Mechanism used to implement the random allocation sequence (eg, central computer/telephone; sequentially numbered, opaque, sealed containers), describing any steps to conceal the sequence until interventions were assigned  **Allocation concealment was ensured using sequentially numbered, opaque, sealed envelopes prepared by an independent statistician. Envelopes were opened only after patient enrolment.** | 3 |
|  | Implementation | 19 | Whether the personnel who enrolled and those who assigned participants to the interventions had access to the random allocation sequence  **Participants were enrolled by an anesthesiologist who was blinded to the allocation sequence. Group assignment was performed by a separate staff member using sealed envelopes.** | 3 |
|  | Blinding | 20a | Who was blinded after assignment to interventions (eg, participants, care providers, outcome assessors, data analysts)  **Outcome assessors were blinded to group allocation. Although anesthesiologists could not be blinded due to the nature of the intervention, all evaluations of pain scores, PONV, and patient satisfaction were conducted by blinded personnel.** | 3 |
|  | 20b | If blinded, how blinding was achieved and description of the similarity of interventions  **Outcome assessors were blinded to group allocation. Due to the visible use of ANI monitoring, anesthesiologists could not be blinded. However, pain assessments and postoperative evaluations were conducted by blinded staff to minimize bias.** | 3 |
|  | Statistical methods | 21a | Statistical methods used to compare groups for primary and secondary outcomes, including harms  **Statistical comparisons between groups were performed using independent t-tests for continuous variables and chi-square tests for categorical variables. A p-value < 0.05 was considered statistically significant.** | 5 |
|  | 21b | Definition of who is included in each analysis (eg, all randomised participants), and in which group  **All randomized participants were included in the final analysis according to their assigned groups (intention-to-treat analysis).** | 5 |
|  | 21c | How missing data were handled in the analysis  **Some participants had missing data for specific outcomes (e.g., PONV, satisfaction). These cases were excluded from those analyses. No imputation was performed.** | 5 |
|  | 21d | Methods for any additional analyses (eg, subgroup and sensitivity analyses), distinguishing prespecified from post hoc  **No subgroup or sensitivity analyses were reported. All analyses presented were prespecified in the study protocol.** | - |
|  | **Results** | | |  |
|  | Participant flow, including flow diagram | 22a | For each group, the numbers of participants who were randomly assigned, received intended intervention, and were analysed for the primary outcome  **58 patients were randomized:**  **- 29 to the ANI-guided group**  **- 29 to the control group** | 5 |
|  | 22b | For each group, losses and exclusions after randomisation, together with reasons  **4 patients were excluded:**  **- 3 from the ANI group (incomplete ANI data)**  **- 1 from the control group (ICU admission before emergence)**  **- 54 patients were analysed for the primary outcome:**  **- 26 in the ANI group**  **- 28 in the control group** | 5 |
|  | Recruitment | 23a | Dates defining the periods of recruitment and follow-up for outcomes of benefits and harms  **Recruitment and follow-up were conducted from June 2018 to June 2019 at Sina Hospital.** | 3 |
|  | 23b | If relevant, why the trial ended or was stopped  **The trial was completed as planned. There is no indication that it was stopped early or terminated for any reason**. | - |
|  | Intervention and comparator delivery | 24a | Intervention and comparator as they were actually administered (eg, where appropriate, who delivered the intervention/comparator, how participants adhered, whether they were delivered as intended (fidelity))  **Yes – Both intervention and comparator were administered as intended, with high protocol fidelity and >95% adherence.** | 3 |
|  | 24b | Concomitant care received during the trial for each group  **Yes – Concomitant care and co-interventions were similar across groups, except for the ANI-guided remifentanil titration.** | 3 |
|  | Baseline data | 25 | A table showing baseline demographic and clinical characteristics for each group  **Yes – Baseline demographic and clinical characteristics are presented in Table 1, with appropriate group comparisons.** | 5 |
|  | Numbers analysed,  outcomes and estimation | 26 | For each primary and secondary outcome, by group:  ● the number of participants included in the analysis: **58 participants (29 per group) were included in the final analysis**  ● the number of participants with available data at the outcome time point: **Outcome data were available for 54 of 58 participants; exclusions and reasons are documented.**  ● result for each group, and the estimated effect size and its precision (such as 95% confidence interval): **Yes – Group results, effect size, and confidence interval for the primary outcome are reported.**  ● for binary outcomes, presentation of both absolute and relative effect size: **Yes – Binary outcomes are reported with percentages, p-values, and both absolute and relative effect sizes (e.g., risk difference and risk ratio for PONV).** | 5  5 |
|  | Harms | 27 | All harms or unintended events in each group  **Harms were systematically assessed, including postoperative nausea and vomiting (PONV), respiratory complications, and shivering. These outcomes were predefined in the protocol and monitored throughout recovery. No serious adverse events were reported.** | 6 |
|  | Ancillary analyses | 28 | Any other analyses performed, including subgroup and sensitivity analyses, distinguishing pre-specified from post hoc  **No subgroup or sensitivity analyses were performed. All reported analyses were pre-specified in the study protocol**. | - |
|  | **Discussion** | | |  |
|  | Interpretation | 29 | Interpretation consistent with results, balancing benefits and harms, and considering other relevant evidence  **Interpretation aligns with results, emphasizing benefits of ANI-guided analgesia. Harms were minimal and monitored. Findings are supported by relevant prior evidence.** | 7 |
|  | Limitations | 30 | Trial limitations, addressing sources of potential bias, imprecision, generalisability, and, if relevant, multiplicity of analyses  **Yes, the trial limitations are clearly stated in the article. The authors mention the single-center design and small sample size, which may limit generalisability. They also acknowledge the lack of blinding for anesthesiologists as a potential source of bias. Additionally, they note that ANI accuracy may be influenced by ventilation settings, anesthetic depth, and autonomic variability. No subgroup or sensitivity analyses were performed, and all reported analyses were pre-specified.** | 7 |

Citation: Hopewell S, Chan AW, Collins GS, Hróbjartsson A, Moher D, Schulz KF, et al. CONSORT 2025 Statement: updated guideline for reporting randomised trials. BMJ. 2025; 388:e081123. <https://dx.doi.org/10.1136/bmj-2024-081123>
© 2025 Hopewell et al. This is an Open Access article distributed under the terms of the Creative Commons Attribution License (<https://creativecommons.org/licenses/by/4.0/>), which permits unrestricted use, distribution, and reproduction in any medium, provided the original work is properly cited.

*We strongly recommend reading this statement in conjunction with the CONSORT 2025 Explanation and Elaboration and/or the CONSORT 2025 Expanded Checklist for important clarifications on all the items. We also recommend reading relevant CONSORT extensions. See [www.consort-spirit.org](http://www.consort-spirit.org).
