# Supplementary material for: ANI-Guided vs. Standard Remifentanil Dosing in Spine Surgery: A Randomized Controlled Trial
Source: Research Square preprint supplement (doi:10.21203/rs.3.rs-7362858/v1), 2025-11-05
Supplement: Supplementary file 2 [file e95a55b625f0fe21701395c2.docx]

**CONSORT 2010 Flow Diagram**

## Follow-Up

## Enrollment

Allocated to intervention ANI group (n= 29 )

 Received allocated intervention (n=29 )

 Did not receive allocated intervention (give reasons) (n=0 )

## Allocation

Allocated to intervention Control group (n= 29 )

 Received allocated intervention (n= 29 )

 Did not receive allocated intervention (give reasons) (n=0 )

Randomized (n=58 )

Excluded (n= 0 )

  Not meeting inclusion criteria (n=0 )

  Declined to participate (n=0 )

  Other reasons (n=0 )

Assessed for eligibility (n= 58 )

## Analysis

Analysed Control group (n=28 )
 Excluded from analysis (give reasons) (n= 1 )

Analysed ANI group (n=26 )
 Excluded from analysis (give reasons) (n=3 )

Lost to follow-up Control group (give reasons) (n=0 )

Discontinued intervention (give reasons) (n=0 )

Lost to follow-up ANI group (give reasons) (n= 0 )

Discontinued intervention (give reasons) (n=0 )
